# Supplementary material
Source: Elsevier journal article supplement (https://eprints.lib.hokudai.ac.jp/dspace/bitstream/2115/71028/2/mmc1.xlsx)
Supplement: mmc1 [file mmc1.xlsx]

## Sheet: Sheet1
Supplementary Table 1 Primer sequences used for RT-qPCR analysis
Gene	Forward or Reverse	Sequence
Tnf	F	CATCTTCTCAAATTCGAGTGACAA
	R	TGGGAGTAGACAAGGTACAACCC
Il6	F	GAGGATACCACTCCCAACAGACC
	R	AAGTGCATCATCGTTGTTCATACA
Actb	F	CTGGGACGATATGGAGAAGA
	R	AGAGGCATACAGGGACAACA
